# Supplementary material for: Discovery of Triterpenoids as Reversible Inhibitors of α/β-hydrolase Domain Containing 12 (ABHD12)
Source: PubMed Central journal article supplement (PMC4045134; doi:10.1371/journal.pone.0098286), 2014-05-30
Supplement: pone.0098286.s003.pdf [file pone.0098286.s003.pdf]

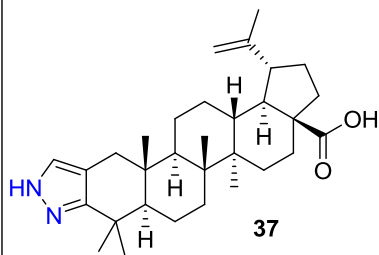

$IC_{50} = 1.4 \mu M$   
Max inhibition 100%

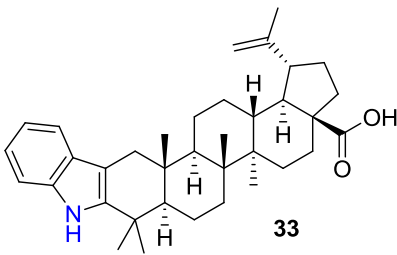

$IC_{50} = 0.9 \mu M$   
Max inhibition 65%

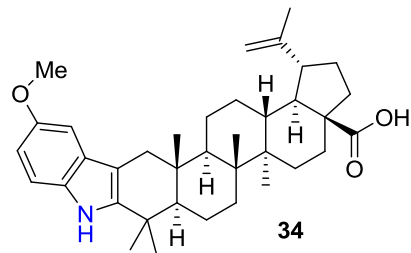

$IC_{50} = 1.6 \mu M$   
Max inhibition 100%

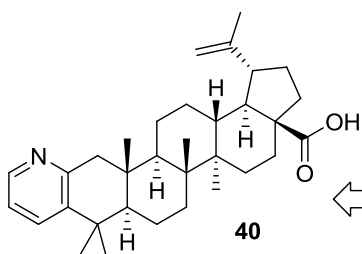

35% inhibition at  $10 \mu M$

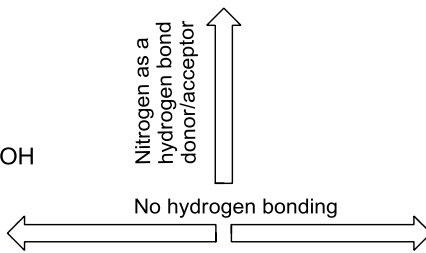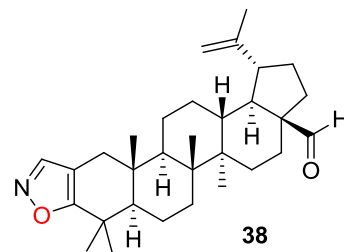

No inhibition at  $10 \mu M$

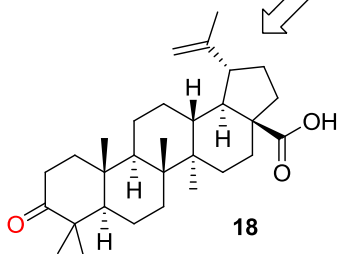

$IC_{50} = 3.3 \mu M$   
Max inhibition 100%

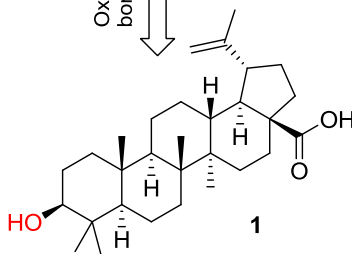

$IC_{50} = 2.5 \mu M$

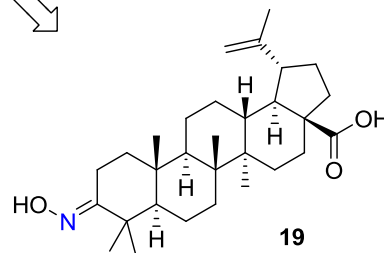

$IC_{50} = 12 \mu M$   
Max inhibition 100%
