# Supplementary material for: Discovery of Triterpenoids as Reversible Inhibitors of α/β-hydrolase Domain Containing 12 (ABHD12)
Source: PubMed Central journal article supplement (PMC4045134; doi:10.1371/journal.pone.0098286), 2014-05-30

**A** Betulinic acid - **LPS**

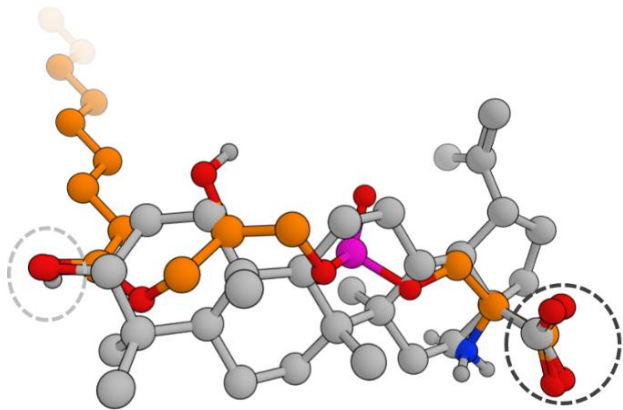

**B** Betulinic acid - **THL**

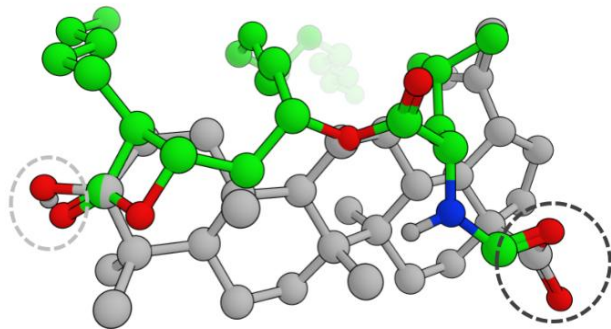

Supplement: pone.0098286.s005.pdf [file pone.0098286.s005.pdf]
