# Supplementary material for: Discovery of Triterpenoids as Reversible Inhibitors of α/β-hydrolase Domain Containing 12 (ABHD12)
Source: PubMed Central journal article supplement (PMC4045134; doi:10.1371/journal.pone.0098286), 2014-05-30
Supplement: pone.0098286.s006.pdf [file pone.0098286.s006.pdf]

| Compound<br>(10 $\mu$ M)  | hABHD6                                            | hMAGL          | hFAAH                                               |
|---------------------------|---------------------------------------------------|----------------|-----------------------------------------------------|
|                           | Remaining activity<br>% control $\pm$ s.e.m (n=3) |                | Remaining activity<br>% control (mean (range)), n=2 |
| <b>1</b> (Betulinic acid) | ~ 70                                              | 76.7 $\pm$ 0.1 | 83 (80-85)                                          |
| <b>8</b> (Maslinic acid)  | NI                                                | 95.6 $\pm$ 0.8 | 83 (82-84)                                          |
| <b>17</b>                 | 93.6 $\pm$ 3.8                                    | 84.1 $\pm$ 4.8 | 95 (88-101)                                         |
| <b>19</b>                 | 85.8 $\pm$ 3.0                                    | 86.6 $\pm$ 2.0 | 91 (91-91)                                          |
| <b>23</b>                 | 83.0 $\pm$ 2.8                                    | 77.5 $\pm$ 3.1 | 98 (92-104)                                         |
| <b>24</b>                 | 92.4 $\pm$ 3.9                                    | 86.0 $\pm$ 4.3 | 95 (88-101)                                         |
| <b>25</b>                 | 103.2 $\pm$ 2.3                                   | 88.7 $\pm$ 4.2 | 97 (90-104)                                         |
| <b>31</b>                 | 93.2 $\pm$ 3.0                                    | 82.7 $\pm$ 4.1 | 91 (87-95)                                          |
| <b>33</b>                 | 81.0 $\pm$ 4.3                                    | 74.8 $\pm$ 4.6 | 90 (85-95)                                          |
| <b>36</b>                 | 80.0 $\pm$ 4.4                                    | 54.1 $\pm$ 4.7 | 88 (88-88)                                          |
| <b>41</b>                 | 85.4 $\pm$ 3.6                                    | 79.4 $\pm$ 4.1 | 90 (86-93)                                          |
| <b>42</b>                 | 88.7 $\pm$ 4.3                                    | 79.8 $\pm$ 4.1 | 93 (91-95)                                          |

NI, no inhibition at 10  $\mu$ M concentration
