# Supplementary material for: Discovery of Triterpenoids as Reversible Inhibitors of α/β-hydrolase Domain Containing 12 (ABHD12)
Source: PubMed Central journal article supplement (PMC4045134; doi:10.1371/journal.pone.0098286), 2014-05-30
Supplement: pone.0098286.s007.pdf [file pone.0098286.s007.pdf]

| Compound                  | CB <sub>1</sub> R agonist activity<br>(rat cerebellar<br>membranes) | CB <sub>2</sub> R agonist activity<br>(hCB <sub>2</sub> R-CHO<br>cell membranes) | CB <sub>1</sub> R antagonist activity<br>(rat cerebellar membranes)               |
|---------------------------|---------------------------------------------------------------------|----------------------------------------------------------------------------------|-----------------------------------------------------------------------------------|
|                           | [ <sup>35</sup> S]GTPγS binding<br>% Basal (Mean (range), n=2)      |                                                                                  | [ <sup>35</sup> S]GTPγS binding<br>% HU210-evoked response<br>(Mean (range), n=2) |
| <b>1</b> (Betulinic acid) | 91 (87-96)                                                          | 132 (106-158)                                                                    | 99 (98-99)                                                                        |
| <b>8</b> (Maslinic acid)  | 93 (88-97)                                                          | 114 (104-123)                                                                    | 99 (97-102)                                                                       |
| <b>23</b>                 | 89 (86-92)                                                          | 98 (95-100)                                                                      | 92 (90-95)                                                                        |
| <b>33</b>                 | 95 (94-96)                                                          | 102 (90-114)                                                                     | 97 (96-98)                                                                        |
| HU210 (1 μM)              | 430 ± 36 <sup>1</sup>                                               | -                                                                                | -                                                                                 |
| HU210 (10 nM)             | -                                                                   | 354 (348-361)                                                                    | -                                                                                 |
| AM251 (1 μM)              | 88 ± 1.5 <sup>1</sup>                                               | -                                                                                | 42 ± 2.7 <sup>1</sup>                                                             |
| SR144528 (1 μM)           | -                                                                   | 68 (60-76)                                                                       | -                                                                                 |

<sup>1</sup> Results are % basal ± SEM, n > 3
