# Supplementary material for: Discovery of Triterpenoids as Reversible Inhibitors of α/β-hydrolase Domain Containing 12 (ABHD12)
Source: PubMed Central journal article supplement (PMC4045134; doi:10.1371/journal.pone.0098286), 2014-05-30
Supplement: pone.0098286.s008.pdf [file pone.0098286.s008.pdf]

| Compound | Structure                                                                           | Remaining activity<br>% control $\pm$ s.e.m (n=3) |
|----------|-------------------------------------------------------------------------------------|---------------------------------------------------|
| 44       | 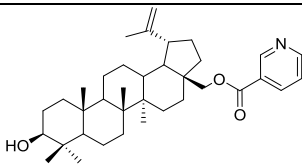   | 95 $\pm$ 0.3                                      |
| 45       |    | 99 $\pm$ 0.6                                      |
| 46       |    | 92 $\pm$ 0.0                                      |
| 47       |   | 95 $\pm$ 0.3                                      |
| 48       |  | 85 $\pm$ 0.6                                      |
| 49       |  | 95 $\pm$ 0.3                                      |
| 50       |  | 94 $\pm$ 0.9                                      |

|    |                                                                                     |               |
|----|-------------------------------------------------------------------------------------|---------------|
| 51 | 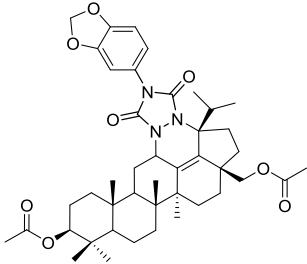   | $100 \pm 3.3$ |
| 52 |    | $93 \pm 0.9$  |
| 53 |   | $82 \pm 0.7$  |
| 54 |  | $97 \pm 0.5$  |
| 55 |  | $90 \pm 0.4$  |
| 56 |  | $92 \pm 0.5$  |

|    |                                                                                     |              |
|----|-------------------------------------------------------------------------------------|--------------|
| 57 | 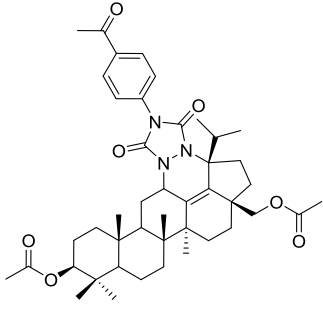   | $97 \pm 1.0$ |
| 58 |    | $88 \pm 1.3$ |
| 59 |   | $86 \pm 1.5$ |
| 60 |  | $93 \pm 0.4$ |
| 61 |  | $96 \pm 1.0$ |
| 62 |  | $98 \pm 0.2$ |

|           |                                                                                     |              |
|-----------|-------------------------------------------------------------------------------------|--------------|
| <b>63</b> | 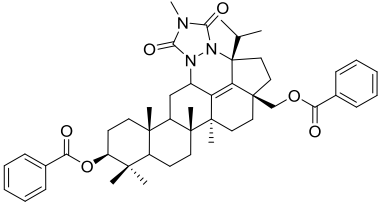   | $93 \pm 1.7$ |
| <b>64</b> |    | $93 \pm 0.2$ |
| <b>65</b> |    | $91 \pm 0.6$ |
| <b>66</b> |  | $77 \pm 2.0$ |
| <b>67</b> |  | $91 \pm 0.6$ |
| <b>68</b> |  | $77 \pm 1.1$ |
